# Supplementary material for: Variability in high-throughput ion-channel screening data and consequences for cardiac safety assessment
Source: PubMed Central journal article supplement — J Pharmacol Toxicol Methods. Author manuscript; Available in PMC 2014 Aug 18. (PMC4135079; doi:10.1016/j.vascn.2013.04.007), 2013-05-05
Supplement: NIHMS59958-supplement-Supplementary_Material.pdf [file NIHMS59958-supplement-Supplementary_Material.pdf]

Supplementary material for:  
Variability in high-throughput ion-channel screening  
data and consequences for cardiac safety assessment

Ryan C. Elkins, Mark R. Davies, Stephen J. Brough,  
David J. Gavaghan, Yi Cui, Najah Abi-Gerges, Gary R. Mirams

April 25, 2013

## Contents

|          |                                                                            |          |
|----------|----------------------------------------------------------------------------|----------|
| <b>S</b> | <b>Supplementary Material</b>                                              | <b>2</b> |
| S.1      | High-throughput screening protocol details . . . . .                       | 2        |
| S.1.1    | AstraZeneca IonWorks screens . . . . .                                     | 2        |
| S.1.2    | GlaxoSmithKline IonWorks screens . . . . .                                 | 6        |
| S.1.3    | GlaxoSmithKline CaV1.2 FLIPR screen . . . . .                              | 10       |
| S.2      | Choice of distributions . . . . .                                          | 11       |
| S.3      | Bayesian inference calculation details . . . . .                           | 16       |
| S.4      | Expanded results: histograms of $pIC_{50}$ and Hill coefficients . . . . . | 19       |
| S.4.1    | IonWorks Quattro: hERG . . . . .                                           | 19       |
| S.4.2    | IonWorks Quattro: $I_{CaL}$ . . . . .                                      | 19       |
| S.4.3    | FLIPR: $I_{CaL}$ . . . . .                                                 | 19       |
| S.4.4    | IonWorks Quattro: $I_{Na}$ . . . . .                                       | 19       |
| S.4.5    | IonWorks Quattro: $I_{Ks}$ . . . . .                                       | 20       |
| S.4.6    | IonWorks Quattro: $I_{to}$ . . . . .                                       | 21       |
| S.5      | Expanded results: simulations . . . . .                                    | 23       |

# 1 S Supplementary Material

## 2 S.1 High-throughput screening protocol details

3 In the following sections we provide full experimental protocol details for  
4 the IonWorks Quattro screens performed at AZ (S.1.1) and GSK (S.1.2),  
5 together with the GSK FLIPR screen (S.1.3). All recordings were made at  
6 room temperature.

### 7 S.1.1 AstraZeneca IonWorks screens

8 These details in this section are as in Davies et al. (2012, Table 1), as the  
9 screens were undertaken by the same team at AstraZeneca, using the same  
10 procedure as that study.

#### 11 Cell culture

12 Cells expressing hKv11.1 (hI<sub>ERG</sub>):

13 Cells<sup>1</sup> were grown in Hams F-12 nutrient mixture and L-glutamine sup-  
14 plemented with 10% FCS and 600 $\mu$ g/ml Hygromycin. Cells used in the  
15 IonWorks were incubated at 37°C for 24 h and then incubated at 28°C for  
16 48–72 h.

17 Cells expressing hNaV1.5 (hI<sub>Na</sub>):

18 Cells<sup>1</sup> were grown in Hams F-12 nutrient mixture and glutamax supple-  
19 mented with 10% FCS and 1,000 $\mu$ g/ml geneticin. Cells used in the Ion-  
20 Works were incubated at 37°C for 24 h and then incubated at 28°C for 24  
21 h.

22 Cells expressing hKv4.3/hKChIP2.2 (hI<sub>to</sub>):

23 Cells<sup>1</sup> were grown in Hams F-12 nutrient mixture and glutamax supple-  
24 mented with 10% FCS, 1,100 $\mu$ g/ml geneticin, and 600  $\mu$ g/ml hygromycin.  
25 Cells used in the IonWorks were incubated at 37°C for 24 h, then at 28°C  
26 for 48 h.

27 Cells expressing hKvLQT1/hminK (hI<sub>Ks</sub>):

28 Cells purchased from Millipore were grown in Iscoves nutrient mixture and  
29 Glutamine supplemented with 10% FCS, 400 $\mu$ g/ml geneticin, 100 $\mu$ g/ml

---

<sup>1</sup>Cells were described by Persson et al. (2005b) and Persson et al. (2005a). All cells were grown to semiconfluence at 37°C in a humidified environment (5% CO<sub>2</sub>).

30 hygromycin, 2% HT supplement (50×), and 1% nonessential amino acids  
31 (100×). Cells used in the IonWorks were incubated at 37°C for 48 h.

32 Cells expressing hCav1.2(hI<sub>Ca</sub>):

33 Cells purchased from Chantest Corporation were grown in Hams F-12 nu-  
34 trient mixture and L-glutamine supplemented with 10% FCS, blasticidin  
35 (10μg/ml), geneticin (G-418, 400μg/ml), hygromycin (250μg/ml), penicillin-  
36 streptomycin (100 units/ml; 100μg/ml), and zeocin (75μg/ml). Twenty-four  
37 hours before assay cells were induced with doxycycline to a final concentra-  
38 tion of 1μg/ml and incubated for a further 68 h at 37°C. They were then  
39 incubated at 28°C overnight.

#### 40 **Preparation of cells for IonWorks**

41 Cells expressing hI<sub>ERG</sub> and hI<sub>Na</sub><sup>2</sup>:

42 After the monolayer of cells was detached with Versene solution (~3 ml,  
43 1:5,000), cells were washed with PBS (Dulbecos phosphate containing Ca<sup>2+</sup>  
44 /Mg<sup>2+</sup>) and centrifuged at 50 g for 4 min. The supernatant was discarded  
45 and the remaining pellet of cells was resuspended in of PBS. For hI<sub>ERG</sub>  
46 (IonWorks) and hI<sub>Na</sub> (Quattro) measurements, cell concentrations of 0.25 ×  
47 10<sup>6</sup> cells/ml and 1 × 10<sup>6</sup> cells/ml were used, respectively.

48 Cells expressing hI<sub>to</sub><sup>2</sup> and hI<sub>Ks</sub>:

49 The method used was the same as that prescribed above, except for the  
50 following changes: cells were washed with PBS (no Ca<sup>2+</sup>/Mg<sup>2+</sup>) and incu-  
51 bated with 0.05% Trypsin/EDTA solution. Both cell lines were adjusted to  
52 1 × 10<sup>6</sup> cells/ml (both run in Quattro mode).

53 Cells expressing hI<sub>CaL</sub>:

54 After the monolayer of cells was washed with PBS, cells were detached with  
55 accutase and centrifuged at 1,100 g for 2 min. The supernatant was dis-  
56 carded and the remaining pellet of cells was resuspended in HBPS containing  
57 10 mM BaCl<sub>2</sub> (HBPS + Ba) to a concentration of 1.5 million cells/ml.

#### 58 **Measurements of currents**

59 Cells are incubated for 3 minutes in the presence of a compound before  
60 acquiring the ion current data post-compound addition.

---

<sup>2</sup>When performing the CHO-hI<sub>Na</sub>/CHO-hI<sub>to</sub> duplex assay, the cell counts were deter-  
mined and the cell concentration for both cell suspensions was adjusted to 1 × 10<sup>6</sup> cells/ml.  
The cells were mixed together to attain a 60:40 ratio hI<sub>Na</sub>:hI<sub>to</sub>. A single voltage pulse  
was applied to evoke the pre- and post-compound currents, and the degree of inhibition  
or stimulation was assessed by dividing the postscan current by the respective prescan  
current for each well.

61  $hI_{\text{ERG}}$ :

62 A holding potential of  $-70\text{mV}$  was applied for 20 s, followed by a 160 ms  
63 step to  $-0\text{mV}$  (allowing an estimated leak current to be measured), and a  
64 100 ms step back to  $-70\text{mV}$ . The voltage was then stepped to  $+40\text{mV}$  for  
65 1 s and a steady-state current was observed. A 2 s step down to  $-30\text{mV}$ ,  
66 inducing the tail current, was then followed by a 0.5 s step to  $-70\text{mV}$ .

67  $hI_{\text{Ks}}$ :

68 The voltage protocol consisted of a 5 s period holding at  $-80\text{mV}$ , a 100 ms  
69 step to  $-100\text{mV}$  (to measure an estimated leak current), a 100 ms step back  
70 to  $-80\text{mV}$ , followed by a 4 s step to  $+40\text{mV}$ , a 300 ms step to  $-40\text{mV}$ , and  
71 finally a 200 ms step to  $-80\text{mV}$ .

72  $hI_{\text{Na}}$  and  $hI_{\text{to}}$ <sup>3</sup>:

73 The voltage protocol consisted of a 15 s period holding at  $-90\text{ mV}$ , a 160ms  
74 step to  $-100\text{mV}$  (to measure an estimated leak current), a 100 ms step back  
75 to  $-90\text{mV}$ , followed by 10 pulses each for a duration of 50 ms applied at  
76 3 Hz. The first eight 50 ms pulses were to  $-20\text{mV}$  and the ninth and tenth  
77 pulses to  $+20\text{ mV}$ . 300 ms after the tenth pulse there was another longer  
78 pulse to  $+20\text{ mV}$  (1 s) with a final 300 ms step to  $-90\text{ mV}$ .

79  $hI_{\text{CaL}}$ :

80 A holding potential of  $-65\text{ mV}$  was applied for 10 s, before depolarizing to  
81  $0\text{mV}$  for 500 ms and a steady-state current observed.

## 82 Solutions

83  $hI_{\text{ERG}}$ ,  $hI_{\text{Ks}}$ ,  $hI_{\text{Na}}$ , and  $hI_{\text{to}}$ :

84 The internal solution was composed of (in mM) 100 K-gluconate, 40 KCl,  
85  $3.2\text{ MgCl}_2$ , 3 EGTA, and 5 HEPES (pH 7.3 using 1 M KOH). The ac-  
86 cess solution was composed of (in mM) 140 KCl, 1 EGTA,  $1\text{ MgCl}_2$ , and  
87 20 HEPES (pH 7.3 using 1 M KOH), and  $100\text{ }\mu\text{g/ml}$  of amphotericin B.  
88 PBS contains (in mM) 136.9 NaCl, 2.7 KCl,  $8\text{ Na}_2\text{HPO}_4$ ,  $1.5\text{ KH}_2\text{PO}_4$ , 0.9  
89  $\text{CaCl}_2\cdot 0.2\text{H}_2\text{O}$ , and  $0.5\text{ MgCl}_2\cdot 0.6\text{H}_2\text{O}$ .

90  $hI_{\text{CaL}}$ :

91 Similarly to the other four currents, same internal solution was used. The  
92 access solution was composed of (in mM): KCl 140, EGTA 1,  $\text{MgCl}_2$  1 and  
93 HEPES 20 (pH 7.3 using 1 M KOH), 4 mM escin, 2 mM  $\text{K}_2\text{ATP}$  and 0.3  
94 mM  $\text{Na}_2\text{GTP}$ . HBPS contains (in mM): 135 NaCl, 4 KCl, 10 HEPES, 10

---

<sup>3</sup>The degree of response for  $hI_{\text{Na}}$  current was assessed for both the first and eighth pulses, while the effect on  $hI_{\text{to}}$  was assessed for the eleventh pulse.

95 Glucose 1 MgCl<sub>2</sub>0.6H<sub>2</sub>O, pH 7.4.

96 **Positive controls**

97 hI<sub>ERG</sub>:

98 Cisapride was solubilized in DMSO at a concentration of 3mM and further  
99 diluted in PBS to make a top test concentration of 10μM.

100 hI<sub>Na</sub> and hI<sub>to</sub>:

101 Flecainide was solubilized in DMSO at a concentration of 95mM and further  
102 diluted in PBS to make a top test concentration of 31.6μM.

103 hI<sub>Ks</sub>:

104 XE991 was solubilized in DMSO at a concentration of 9.5mM and further  
105 diluted in PBS to make a top test concentration of 31.6μM.

106 hI<sub>CaL</sub>:

107 Verapamil was solubilized in DMSO at a concentration of 316mM and fur-  
108 ther diluted in HPBS + Ba<sup>2+</sup> to make a top test concentration of 100μM.

109 **Serial dilutions**

110 hI<sub>ERG</sub>, hI<sub>Ks</sub>, hI<sub>Na</sub>, hI<sub>to</sub>, and hI<sub>CaL</sub>:

111 Each test compound was solubilized and serially diluted 7 times by half log<sub>10</sub>  
112 units in DMSO as stock solutions. Each of these concentrations was then  
113 further diluted 100-fold in PBS (HBPS + Ba<sup>2+</sup> for hI<sub>Ca</sub>) in a 96-well plate.  
114 Each compound was then diluted threefold in PBS (HBPS + Ba<sup>2+</sup> for hI<sub>Ca</sub>)  
115 in the PatchPlate to give the final test concentrations.

116 **Data Analysis**

117 IonWorks data were either IC<sub>50</sub> or EC<sub>50</sub> value from one or more runs (Table  
118 3). For each run, a noncumulative 8-point concentration-effect curve was  
119 produced and an IC<sub>50</sub> or EC<sub>50</sub> value was determined, with data for a given  
120 concentration of compound being from between 1 and 8 wells. When two  
121 or more runs were performed then the data were merged before fitting a  
122 Hill curve from which a single IC<sub>50</sub> or EC<sub>50</sub> value was derived. Data were  
123 normalized to vehicle (0.1% DMSO), and the differences between vehicle and  
124 top concentration tested were assessed for statistical significance using the  
125 Students t-test and showing greater than 25% change from control (being  
126 the amount needed to observe a difference beyond the experimental noise).  
127 Where an antagonistic effect was observed with a compound, the data were  
128 then fitted to a simple pore block model using the Hill equation, allowing the  
129 Hill coefficient to vary but assuming that the compound would eventually

130 cause complete block of the channel. Agonists were not considered in this  
131 study.

## 132 **S.1.2 GlaxoSmithKline IonWorks screens**

### 133 **Cell preparation**

#### 134 **Human NaV1.5:**

135 Human embryonic kidney-293 (HEK293) cells were stably transfected with  
136 human NaV1.5 expression vector (pCIN5-hNaV1.5). Cells were cultured in  
137 DMEM with F12, supplemented with 10% FBS, 1x NEAA, plus 400 $\mu$ g/ml  
138 geneticin. Cells were grown and maintained at 37°C in a humidified en-  
139 vironment containing 5% CO<sub>2</sub>. Media without geneticin was used for cell  
140 harvesting. Cells with less than 80% confluency were detached from the  
141 T75 culture flask for passage and harvesting using TrypLE or Versene. Af-  
142 ter media aspiration cells were washed with pre-warmed Ca<sup>2+</sup>- and Mg<sup>2+</sup>-  
143 free D-PBS. Then 3 ml pre-warmed TrypLE or Versene were added for 3–5  
144 min, respectively, followed by addition of 10–12 ml pre-warmed Ca<sup>2+</sup>- and  
145 Mg<sup>2+</sup>-containing D-PBS. Finally cells were gently mixed 3–4 times. The  
146 suspension was centrifuged at 300 x G for 2 minutes, the pellet resuspended  
147 to a cell concentration of of 2–3 million cells/ml and that solution added to  
148 the IonWorks™ instrument.

#### 149 **hERG:**

150 Chinese hamster ovary (CHO) cells stably expressing hERG were cultured  
151 in M1 DMEM Hams with F12, supplemented with 10% FBS and 400 $\mu$ g/ml  
152 geneticin. Cells were thawed in T175 flasks at 6–8 million cells per T175  
153 flask, maintained at 37°C in a humidified environment containing 5% CO<sub>2</sub>  
154 for 3–4 hours and transferred to a 30°C incubator containing 5% CO<sub>2</sub> and  
155 incubate for another 72 hrs before assaying. On day of assay, cells which  
156 were over 80% confluence were used. Media were removed and cells were  
157 washed with warm PBS (without magnesium and calcium) two times. 5ml  
158 pre-warmed Versene was added for 6 min, followed by addition of 10ml of  
159 warm M1 media. The suspension was placed into a 15ml centrifuge tube  
160 and spun for 2 min at 1K rpm. The supernatant was removed and cells  
161 were re-suspend in 5ml of warm M1 media and incubated for 5 mins for the  
162 cells to recover. After 5 mins the cells the suspension was centrifuged at 1K  
163 rpm for 2 mins, the pellet re-suspended to a cell concentration of 4–5 million  
164 cells/ml and that solution was added to the IonWorks™.

165 KCNQ1:

166 Chinese hamster ovary (CHO) cells were stably transfected with KCNQ1  
167 (also known as Kv1.7 or KvLQT1) — the pore forming unit of the cardiac  
168 potassium current inward rectifier, and KCNE1 (also known as minK) the  
169 auxiliary subunit in the cardiac ion channel. Cells were cultured in IMDM  
170 ISCOVE media, supplemented with 10% FBS and 800 $\mu$ g/ml geneticin, 1ml  
171 hygromycin, 5ml Pen/Strep and filtered. Cells were thawed in T175 flasks at  
172 6–8 million cells per T175 flask, maintained at 37°C in a humidified environ-  
173 ment containing 5% CO<sub>2</sub> for 24 hours and transferred to a 30°C incubator  
174 containing 5% CO<sub>2</sub> and incubated for another 48 hrs before assaying. On  
175 day of assay, confluency of cells should be < 40% for screening. Media  
176 were removed, and cells were washed with warm KCNQ1 external solution  
177 (without magnesium and calcium). 3 ml pre-warmed TrypLE was added  
178 for 2–3 mins, followed by addition of 10 ml of warm KCNQ1 external so-  
179 lution (without magnesium and calcium). The suspension was placed into  
180 a 15 ml centrifuge tube and spun for 2 mins at 1K rpm. The supernatant  
181 was removed and cells re-suspended in 5 ml of warm KCNQ1 external so-  
182 lution (with magnesium and calcium). The pellet was re-suspended to a  
183 cell concentration of 3.5–4.5 million cells/ml and that solution added to the  
184 IonWorks™.

## 185 **Experimental Protocols**

186 All currents were recorded before and after the addition of compound using  
187 a Molecular Devices IonWorks Quattro automated electrophysiology instru-  
188 ment in Population Patch-Clamp mode.

189 Human NaV1.5:

190 The intracellular solution contained the following: 100mM K-gluconate,  
191 40mM KCl, 3.2mM MgCl<sub>2</sub>, 5mM HEPES, 3mM EGTA, pH 7.3 with KOH.  
192 Amphotericin-B solution was prepared as 50mg/ml stock solution in di-  
193 methylsulfoxide (DMSO) and diluted to a final working concentration of  
194 0.1 mg/ml in intracellular solution. The external solution was D-PBS and  
195 contained the following: 0.90mM CaCl<sub>2</sub>, 2.67mM KCl, 1.47mM KH<sub>2</sub>PO<sub>4</sub>,  
196 0.493mM MgCl<sub>2</sub>, 137.9mM NaCl, 8.06mM Na<sub>2</sub>HPO<sub>4</sub>, pH 7.4. All wells  
197 with a pre- and post-drug addition resistance of > 20M $\Omega$  and which yielded  
198 a > 200pA transient inward NaV current were included in the analysis.

199 The voltage pulse protocol applied pre- and post- compound addition was  
200 as follows: From a holding potential of –80mV (30 seconds), a train of five  
201 200 millisecond depolarising voltage pulses were applied at a frequency of

202 2 Hz. The peak of the inward currents during the first and fifth 0 mV depo-  
203 larisation were exported for the pre- and post-drug conditions. The amount  
204 of compound block observed at the fifth pulse determines the accumulated  
205 block observed and is expressed a percentage of the pre-compound current  
206 observed at the first pulse to give a measure of the “global” (tonic and  
207 use-dependent) block achieved by the compound.

208 **hERG:**

209 The KCl intracellular solution contained the following: 140mM KCl, 1mM  
210 MgCl<sub>2</sub>, 1mM CaCl<sub>2</sub>, 20mM HEPES, pH 7.3 with KOH. Amphotericin-B so-  
211 lution was prepared as 50mg/ml stock solution in dimethylsulfoxide (DMSO)  
212 and diluted to a final working concentration of 0.1 mg/ml in intracellular  
213 solution. The external solution was D-PBS (-). The voltage pulse protocol  
214 applied pre- and post- compound addition was as follows: hERG currents  
215 were activated by 4 sec depolarising pulse to +40mV from a holding poten-  
216 tial of -80mV. The cells were then repolarised to -50mV to generate large  
217 outward tail currents for 5 sec.

218 **KCNQ1:**

219 The KCNQ1 internal solution contained the following: 100mM Potassium  
220 Gluconate, 54mM Potassium Chloride, 3.2mM MgCl<sub>2</sub>, 5mM HEPES, pH 7.3  
221 with KOH. All solutions were filtered before use. Amphotericin-B solution  
222 was prepared as 50mg/ml stock solution in dimethylsulfoxide (DMSO) and  
223 diluted to a final working concentration of 0.1mg/ml in intracellular solution.  
224 The KCNQ1 external solution with Ca<sup>2+</sup> and Mg<sup>2+</sup> contained the following:  
225 65mM Sodium Gluconate, 70mM Sodium Chloride, 5mM Potassium Chlo-  
226 ride, 0.5mM MgCl<sub>2</sub>, 1mM CaCl<sub>2</sub>, 5mM HEPES, pH 7.4 with NaOH. The  
227 KCNQ1 external solution without Ca<sup>2+</sup> and Mg<sup>2+</sup> contained the following:  
228 65mM Sodium Gluconate, 70mM Sodium Chloride, 5mM Potassium Chlo-  
229 ride, 5mM HEPES, pH 7.4 with NaOH. The voltage pulse protocol applied  
230 pre- and post- compound addition was as follows: From a holding potential  
231 of -80mV (100ms), test opener potential 0 mV for 4s, step to -10mV for  
232 2s, holding potential -80mV for 5s, test blocker potential +50mV for 4s,  
233 step to -10mV for 2s. The amount of compound block observed at the  
234 end of the +50mV pulse and is expressed a percentage of the pre-compound  
235 current observed at the beginning of the +50mV pulse to give a measure of  
236 the tonic block achieved by the compound.

237 **Data Analysis**

238 Ionworks recordings are population patch measurements in which the av-



239 erage of the current across many cells is determined. Hence the word ob-  
240 servation is used for a single concentration response curve. There could be  
241 several observations on a certain day.

242 Human NaV1.5:

243 Comparisons between pre-drug peak transient inward currents at the first  
244 pulse and post-drug peak transient inward currents fifth pulse were used  
245 to determine the global inhibitory effect of the compound. Data were nor-  
246 malised to the high and low controls. Low controls were wells in which  
247 100 $\mu$ M tetracaine was added for the NaV1.5 blocker assay. High controls  
248 were wells in which only 1% DMSO was added for the NaV1.5 blocker as-  
249 say. The normalised data were analysed by using ActivityBase software.  
250 The amount of NaV1.5 current inhibition observed at the fifth depolarising  
251 pulse after compound addition was expressed as a percentage of the peak  
252 current observed at the first pulse before compound addition and used to  
253 generate a global block concentration dose response.

254 hERG:

255 Data were normalised to the high and low controls. Low controls were  
256 wells in which 50 $\mu$ M Quinidine was added for the hERG blocker assay.  
257 High controls were wells in which only 1% DMSO was added for the hERG  
258 assay. The normalised data were analysed by using ActivityBase software.  
259 The amount of tonic block is calculated from peak (maximum tail current  
260 value). This value is amplitude of the peak tail current minus the steady  
261 state average value obtained at  $-50$ mV holding potential before the first  
262 voltage step to  $+40$ mV.

263 KCNQ1:

264 Data were normalised to the high and low controls. Low controls were wells  
265 in which an internal characterised full block compound was added for the  
266 KCNQ1 blocker assay. DMSO concentration in compound wells and high  
267 controls wells were only 0.25% for the KCNQ1 assay. The normalised data  
268 were analysed by using ActivityBase software. The current elicited at the  
269 end of the 50mV pulse is normalised to that at the start of the pulse and  
270 normalised to control data.

271 For all channels:

272 Concentration response data were derived using a four parameter concentra-  
273 tion effect curve fitting procedure. pIC50 values and Hill coefficients were  
274 determined from these inhibition curves.

### 275 **S.1.3 GlaxoSmithKline CaV1.2 FLIPR screen**

#### 276 **Cell preparation**

277 Human embryonic kidney-293 (HEK293) cells were stably transfected with  
278 the  $\beta 2a$  and the  $\alpha 2\delta 1$  subunits of CaV1.2 (L-type calcium channel). Cells  
279 were cultured in DMEM HAMS-F12 +10% FBS. Cells were grown and main-  
280 tained at 37°C in a humidified environment containing 5% CO<sub>2</sub>. 24 hours  
281 prior to assay media was removed and replaced with DMEM-F12 media  
282 supplemented with 10% FBS and containing 2.5% hIK and 5% alpha1C  
283 BacMam virus transduction reagents to the cell suspension. Cells with less  
284 than 80% confluency were detached from the T75 culture flask for passage  
285 and harvesting using TrypLE or Versene. Cells were resuspended in DMEM-  
286 F12 media supplemented with 10% FBS and seeded at 15,000 cells per well  
287 in clear-bottom, black-walled 384 well plates.

#### 288 **Experimental Protocol**

289 Human CaV1.2 fluorescence was measured before and after the addition of  
290 a depolarising addition of 400mM KCl using a Molecular Devices 384 well  
291 fluorescent imaging plate reader (FLIPR).

292 Cell media was replaced with tyrodes salt solution supplemented with 20mM  
293 HEPES, 11.9mM NaHCO<sub>3</sub>, 2.5mM probenecid, 0.01% Pluronic acid, 2.5 $\mu$ M  
294 Fluo4-AM (a calcium sensitive fluophore) and 250 $\mu$ M Brilliant Black (quen-  
295 ching solution) at pH7.4 and the cells were incubated at 37°C in a humidified  
296 environment containing 5% CO<sub>2</sub> for 60 minutes. Compounds were prepared  
297 as serial dilution concentration response curves in DMSO before being di-  
298 luted in tyrodes medium immediately prior to assay. Cells were incubated  
299 for 15 minutes in the presence of tyrodes buffer containing compounds of  
300 interest. Cell plates containing compounds were placed inside the FLIPR  
301 and changes in fluorescence measured ( $\lambda_{ex}$ =488nm,  $\lambda_{EM}$ =54nm) (Sullivan  
302 et al., 1999) before and after the addition of the depolarising solution.

#### 303 **Data Analysis**

304 The timecourse of fluorescence across each well of the plate was measured  
305 before and after stimulation, and the maximum, minimum and basal values  
306 were extracted for further analysis.

307 Blockade of the transient increase in fluorescence caused by the influx of  
308 calcium through the activated calcium channel was used to determine the  
309 global inhibitory effect of the compound. Data (maximum minus minimum

310 divided by basal fluorescence value) were normalised to the high and low  
311 controls. Low controls were wells in which 1mM nimodipine was added for  
312 the CaV1.2 blocker assay. High controls were wells in which only 1% DMSO  
313 was added for the CaV1.2 blocker assay. The normalised data were analysed  
314 by using ActivityBase (IDBS) software. Concentration response data were  
315 derived using a four parameter concentration-effect fitting procedure. pIC<sub>50</sub>  
316 values were determined from these inhibition curves.

## 317 S.2 Choice of distributions

318 In order to decide the best distribution to describe the pIC<sub>50</sub> datasets we  
319 generated probability plots for a large range of distributions. Two common  
320 distributions, that both showed a reasonable fit to the data, are the normal  
321 distribution and the logistic distribution. In Figure S1 we show probability  
322 plots for the large Cisapride hERG dataset and these two distributions. The  
323 figure shows that pIC<sub>50</sub> values follow a logistic distribution rather than a  
324 normal distribution.

325 These findings appear to hold reasonably for all of the other assays and  
326 control compounds that were considered, see Figures S2 and S3.

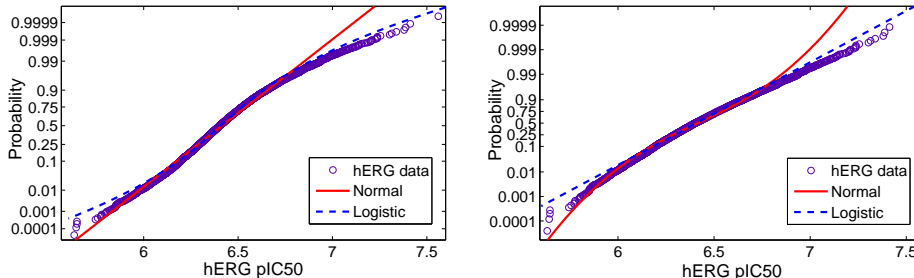

Figure S1: Probability plots for the hERG Cisapride IonWorks Quattro dataset. Left: a normal distribution probability plot, the data deviates from the straight line that a perfect normal distribution would follow. Right: a logistic distribution probability plot, the data is closer to a straight line on this plot (although nearer a normal distribution at lower pIC<sub>50</sub> values), overall a logistic distribution is a much better fit for these data.

327 To estimate the parameters of the distributions we used maximum likelihood  
328 estimates, provided by the MatLab™ statistics toolbox 'mle' function (see

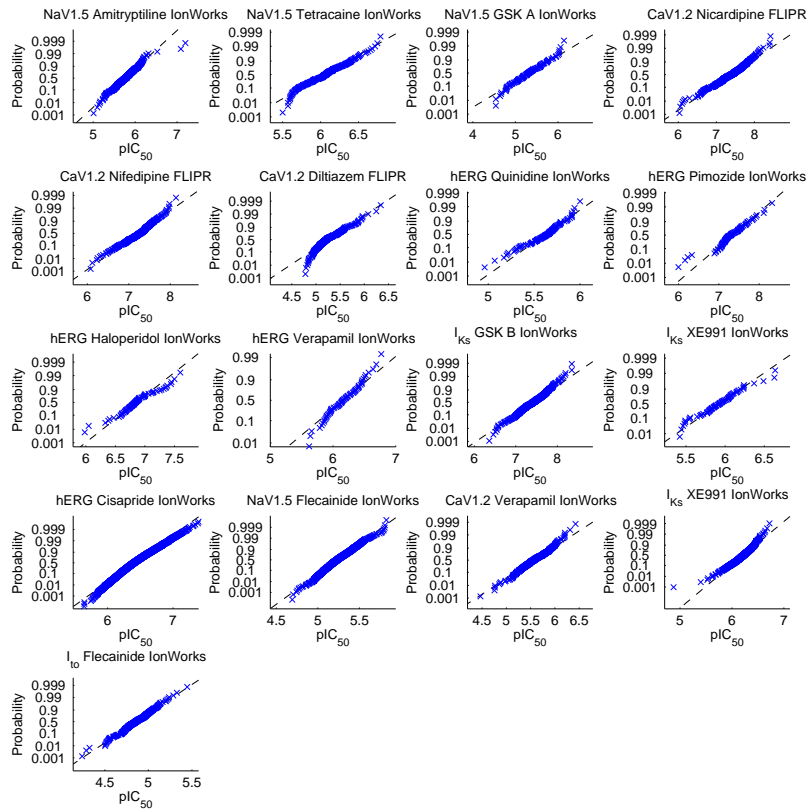

Figure S2:  $pIC_{50}$  logistic distribution probability plots for all control datasets. Data points lying along the straight dashed line would indicate a perfect logistic distribution.

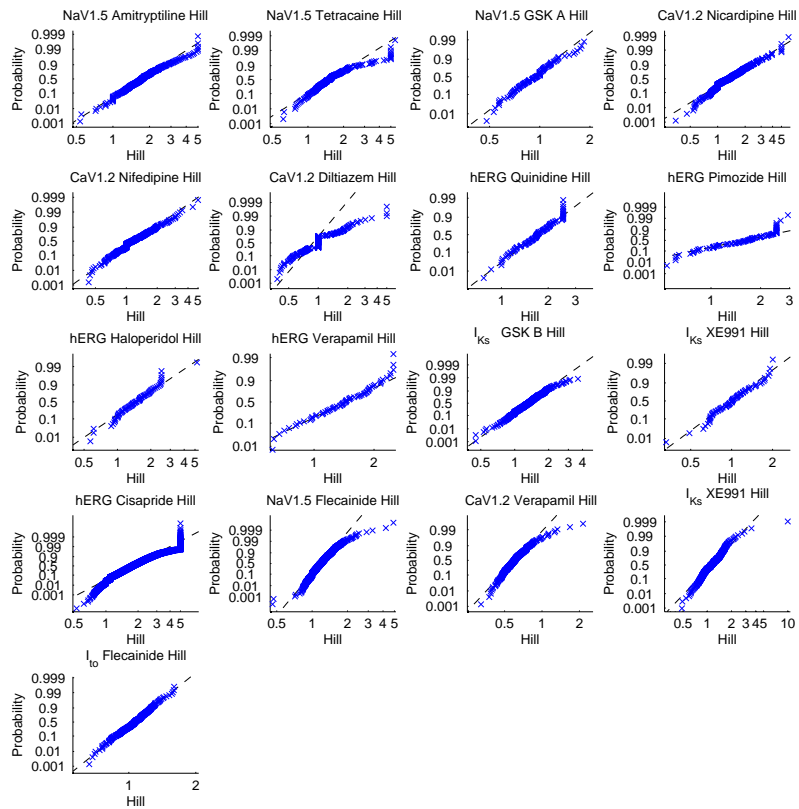

Figure S3: Hill log-logistic distribution probability plots for all control datasets. Data points lying along the straight dashed line would indicate a perfect log-logistic distribution.

329 code in the bolt-on project for Chaste associated with this article, available  
330 to download from <http://www.cs.ox.ac.uk/chaste/download>).

331 Note that MatLab provides two log-logistic parameters that are equal to  $\mu$   
332 and  $\sigma$  from a corresponding logistic distribution, describing

$$\ln(X) \sim \text{Logistic}(\mu, \sigma), \quad (1)$$

333 and to transform to the standard log-logistic parameters describing

$$X \sim \text{LogLogistic}(\alpha, \beta), \quad (2)$$

334 the conversion  $\alpha = e^\mu$  and  $\beta = 1/\sigma$  must be used. To perform the Bayesian  
335 inference described in equations (5) & (6) of the main text we need to  
336 evaluate the probability of a given observation for a certain distribution.  
337 For this we use the probability density function (PDF) for each distribution.  
338 These are given, in the standard notation, by

$$f(x; \mu, \sigma) = \frac{e^{-(x-\mu)/\sigma}}{\sigma(1 + e^{-(x-\mu)/\sigma})^2}, \quad (3)$$

339 for the logistic distribution; and

$$f(x; \alpha, \beta) = \frac{(\beta/\alpha) (x/\alpha)^{\beta-1}}{\left[1 + (x/\alpha)^\beta\right]^2}, \quad (4)$$

340 for the log-logistic distribution.

341 Figure S4 demonstrates how a consistent scaling parameter  $\beta$  does not pre-  
342 vent the spread of the log-logistic probability distribution (equation (4))  
343 increasing for increasing median values  $\alpha$ . This explains why the apparent  
344 increase in the spread of high Hill coefficients shown in Figure 6(a) of the  
345 main text, does not necessarily imply a larger scaling parameter (seen in  
346 Table 1). This phenomenon is not associated with the logistic distribution.

347 The spread parameters that were assumed to underlie the experimental ob-  
348 servations used in the action potential simulations of Section 3.2 are shown  
349 in Table S1.

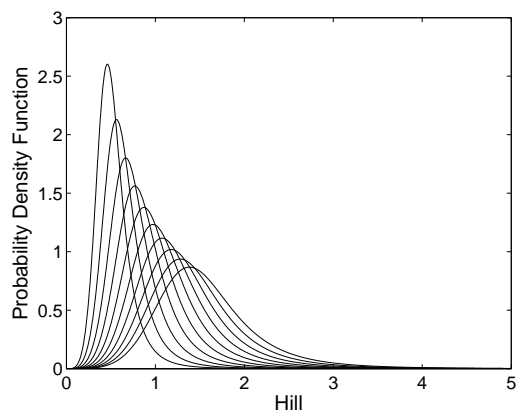

Figure S4: Probability density functions for the Hill coefficient (log-logistic) distribution. Despite the spread about the centre of the distribution increasing, the distribution scaling parameter is the same for each curve: equation (4) is plotted here for a varying median value  $0.5 \leq \alpha \leq 1.5$  with a constant scaling parameter  $\beta = 5$ . These values are typical of the ones found in our assay results (see Table 1 of the main text).

Table S1: Spread parameters that were assumed to underlie the observed experimental data.

| Ion channel     | HTS platform | pIC <sub>50</sub> spread $\sigma$ | Comments          | Hill spread $1/\beta$ | Comments          |
|-----------------|--------------|-----------------------------------|-------------------|-----------------------|-------------------|
| NaV1.5          | IonWorks     | 0.076                             | From AZ control   | 0.084                 | From AZ control   |
| CaV1.2          | IonWorks     | 0.159                             | From AZ control   | 0.121                 | From AZ control   |
| hERG            | IonWorks     | 0.103                             | From AZ control   | 0.178                 | From AZ control   |
| I <sub>Ks</sub> | IonWorks     | 0.140                             | Averaged from all | 0.166                 | Averaged from all |
| I <sub>to</sub> | IonWorks     | 0.086                             | From AZ control   | 0.086                 | From AZ control   |

### 350 S.3 Bayesian inference calculation details

351 In order to simplify this section we discuss how estimates of the ‘true’ pIC<sub>50</sub>  
352 value ( $\mu$ ) might be obtained, exactly the same procedure can be followed  
353 for estimates of the ‘true’ Hill coefficient ( $\alpha$ ) by substituting  $\alpha$  for  $\mu$  in the  
354 following discussion.

355 In order to implement the Bayesian inference scheme, we perform a dis-  
356 cretization of the possible underlying continuum of possibilities for  $\mu$ . In  
357 practice the necessary calculations are cheap for logistic and log-logistic dis-  
358 tributions, and so in what follows we choose  $10^6$  distinct possible ( $i$  and  
359  $j$ ) values, giving a high resolution on the resulting probability distributions.  
360 Let us say this gives a spacing of  $\Delta\mu$  between each discrete value of  $\mu$  that is  
361 considered. In a slight abuse of notation — since the probability of observing  
362 any particular value  $\mu_i$  is vanishingly small — we use  $P(\mu_i | x)$  to represent  
363 the probability of the underlying  $\mu$  being in the range  $\mu_i - \frac{\Delta\mu}{2} < \mu < \mu_i + \frac{\Delta\mu}{2}$ ,  
364 given the observed data  $x$ .

365 We use Bayes’ Theorem to calculate the likelihood of distributions with a  
366 particular median pIC<sub>50</sub> value ( $\mu_i$ ) giving rise to the observed pIC<sub>50</sub> ( $x$ ). In  
367 equation format:

$$P(\mu_i | x) = \frac{P(x | \mu_i)P(\mu_i)}{\sum_{\forall j} P(x | \mu_j)P(\mu_j)}. \quad (5)$$

368 Evaluating equation (5) for all of our possible choices of  $\mu_i$  gives us a distri-  
369 bution for the possible  $\mu$  values. This distribution describes the probability  
370 of the corresponding pIC<sub>50</sub>-centred distribution giving rise to the observed  
371 experimental data. Note here that there is a ‘prior’,  $P(\mu_i)$ , in equation (5).  
372 For pIC<sub>50</sub> values we choose a uniform prior on  $[-12, 12]$ . The prior is the  
373 probability of observing a given  $\mu_i$  value before considering the data  $x$ . Our  
374 prior implies that any pIC<sub>50</sub> between  $-12$  and  $+12$  is equally likely, and  
375 that no value outside these can be taken. We perform the same analysis for  
376  $\alpha$  in the case of Hill coefficients, with our prior being uniform on  $[0.1, 10]$ .  
377 The sum on the denominator is a discretised version of an integral, that is  
378 used for the numerical computation.

379 The pIC<sub>50</sub> values considered during drug development and safety testing  
380 may be an average of a small number of individual HTS assays. In this case  
381 equation (5) can be adapted to calculate the probability of observing ‘ $n$ ’  
382 independent recordings (represented by  $\mathbf{x} = [x_1, x_2, \dots, x_n]$ , and indexed by



383  $k$ ) as follows:

$$P(\mu_i | \mathbf{x}) = \frac{\prod_{\forall k} P(x_k | \mu_i)P(\mu_i)}{\sum_{\forall j} \prod_{\forall k} P(x_k | \mu_j)P(\mu_j)}. \quad (6)$$

384 If repeat experiments yield similar values (as the results in section 3.1 sug-  
385 gest), their effect is to reduce the effective spread of the  $P(\mu_i | \mathbf{x})$  distri-  
386 bution. We therefore tend to obtain a narrower distribution for the ‘true’  
387 pIC<sub>50</sub> values when multiple experiments are performed, as shown in Figure 3  
388 of the main text.

389 We convert the resulting probability density function for  $\mu$  to an inverse  
390 cumulative distribution function numerically, and therefore gain a method  
391 for converting random numbers between 0 and 1 into samples of  $\mu$  that may  
392 have given rise to the observed data. This is the method used in Section 2.4.2  
393 of the main text.

394 There was little, if any, correlation between IC<sub>50</sub> and Hill for any of the  
395 assays, as can be seen in Figure S5. We therefore obtained samples from the  
396 respective distributions independently.

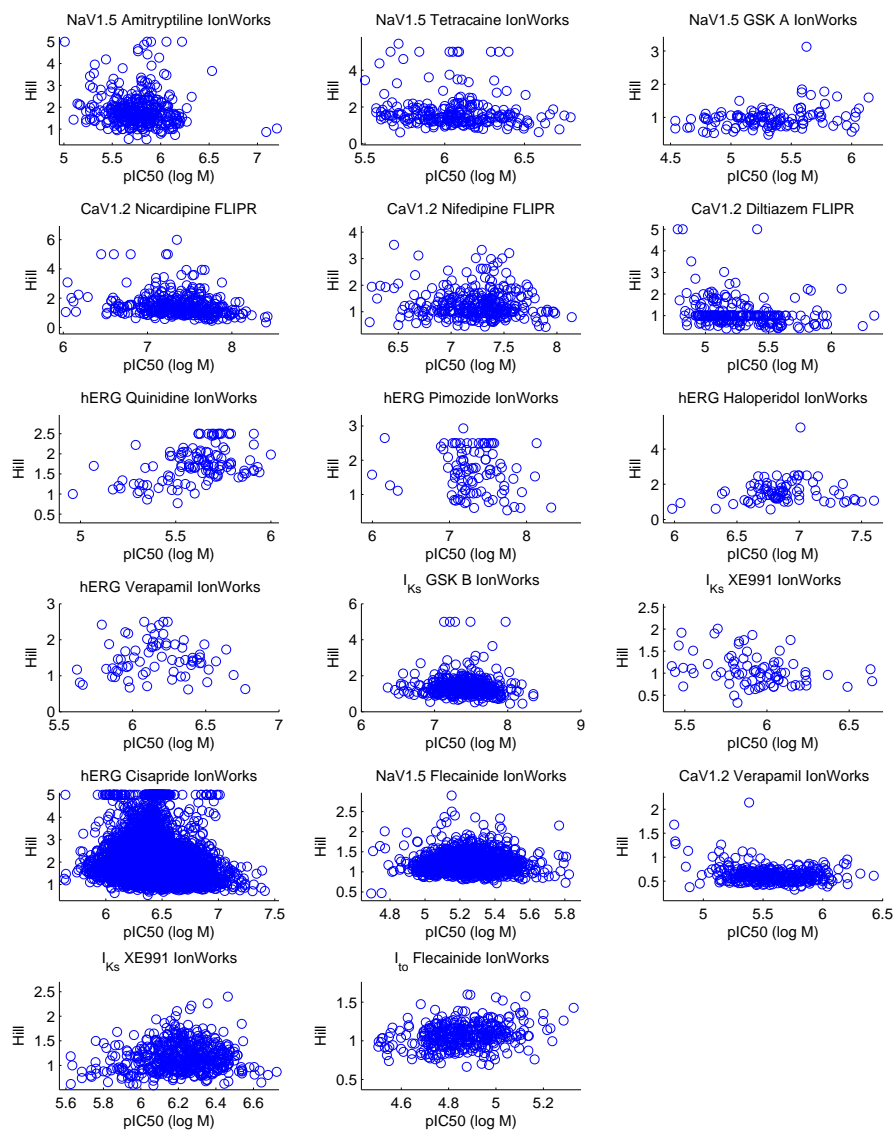

Figure S5: Scatter plots of the individual pIC<sub>50</sub> values and Hill coefficients for each control assay. The lack of correlation suggests that the two can be treated as independent for sampling purposes.

397 **S.4 Expanded results: histograms of  $pIC_{50}$  and Hill coefficients**  
398

399 **S.4.1 IonWorks Quattro: hERG**

400 Full histograms and fits for each compound are shown in Figures S6 and S7.  
401 The histogram for Cisapride is shown in Figure 2 of the main text.

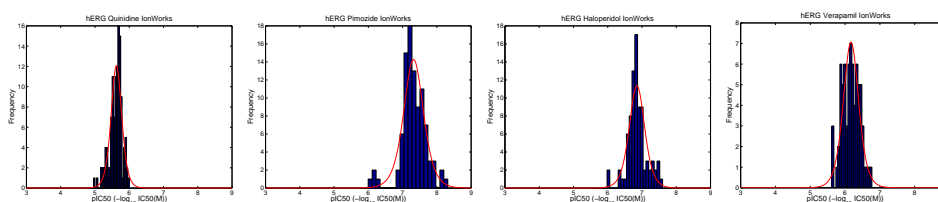

Figure S6:  $pIC_{50}$  histograms for all IonWorks hERG controls.

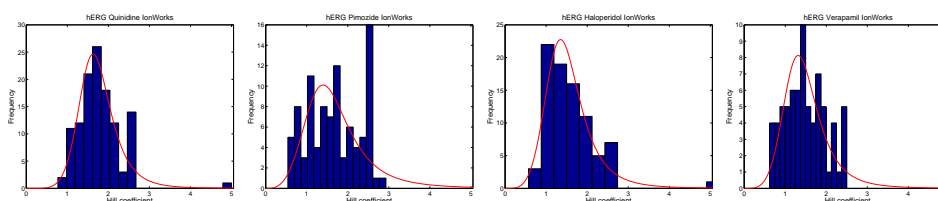

Figure S7: Hill coefficient histograms for all IonWorks hERG controls.

402 **S.4.2 IonWorks Quattro:  $I_{CaL}$**

403 Full histograms and fits for each compound are shown in Figure S8.

404 **S.4.3 FLIPR:  $I_{CaL}$**

405 Full histograms and fits for each compound are shown in Figures S9 and  
406 S10.

407 **S.4.4 IonWorks Quattro:  $I_{Na}$**

408 Full histograms and fits for each compound are shown in Figures S11 and  
409 S12.

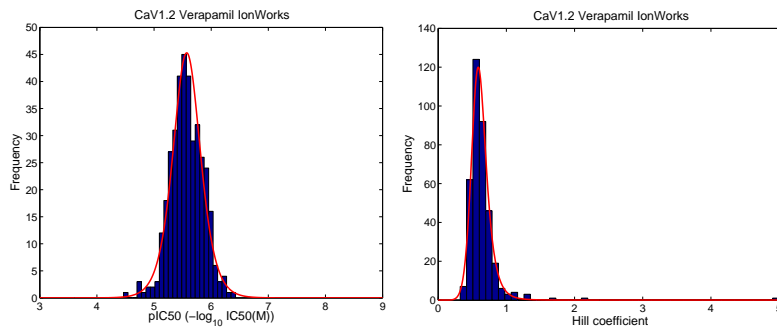

Figure S8:  $pIC_{50}$  and Hill histograms for IonWorks CaV1.2 control.

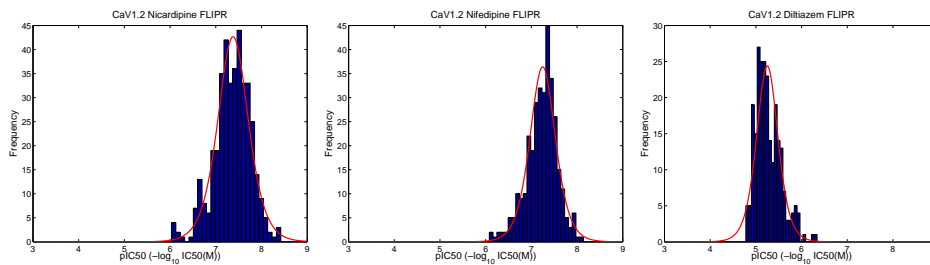

Figure S9:  $pIC_{50}$  histograms for all FLIPR CaV1.2 controls.

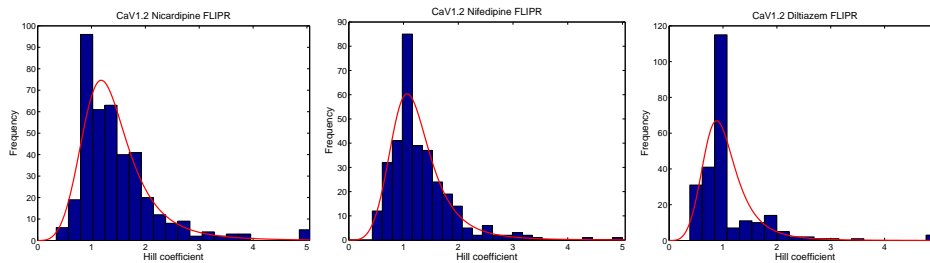

Figure S10: Hill coefficient histograms for all FLIPR CaV1.2 controls.

#### 410 S.4.5 IonWorks Quattro: $I_{Ks}$

411 Full histograms and fits for each compound are shown in Figures S13 and  
 412 S14.

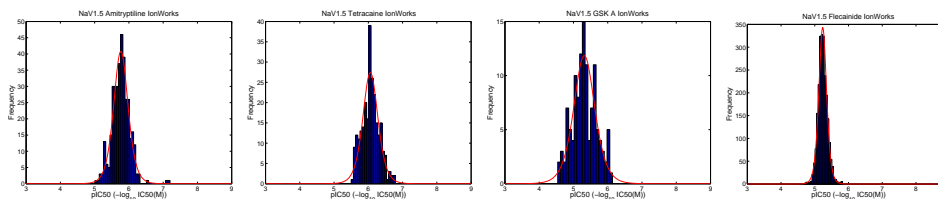

Figure S11:  $pIC_{50}$  histograms for all IonWorks NaV1.5 controls.

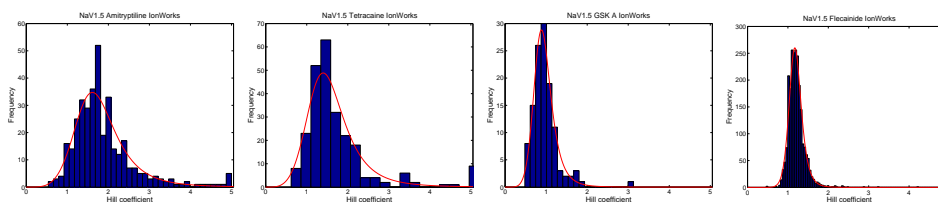

Figure S12: Hill coefficient histograms for all IonWorks NaV1.5 controls.

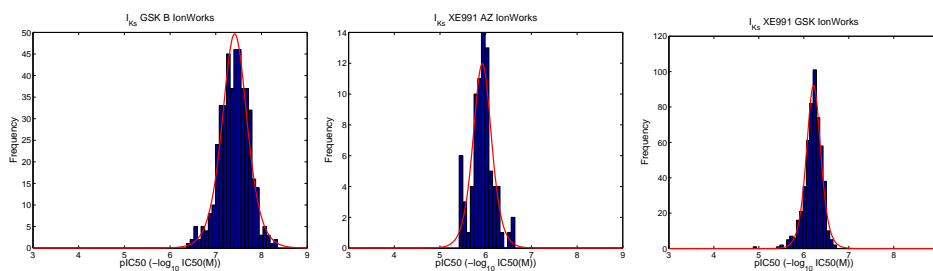

Figure S13:  $pIC_{50}$  histograms for all IonWorks KCNQ1/minK controls.

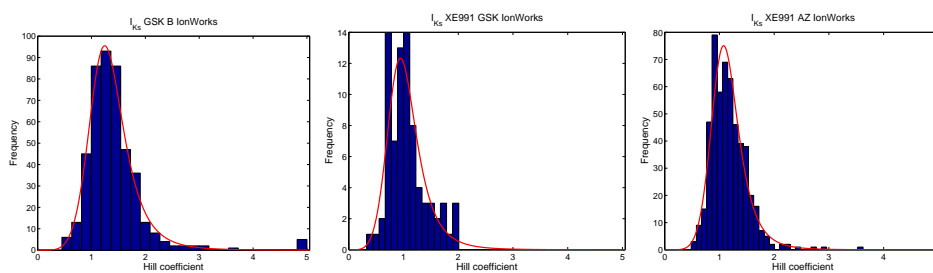

Figure S14: Hill coefficient histograms for all IonWorks KCNQ1/minK controls.

#### 413 S.4.6 IonWorks Quattro: $I_{to}$

414 Full histograms and fits for each compound are shown in Figure S15.

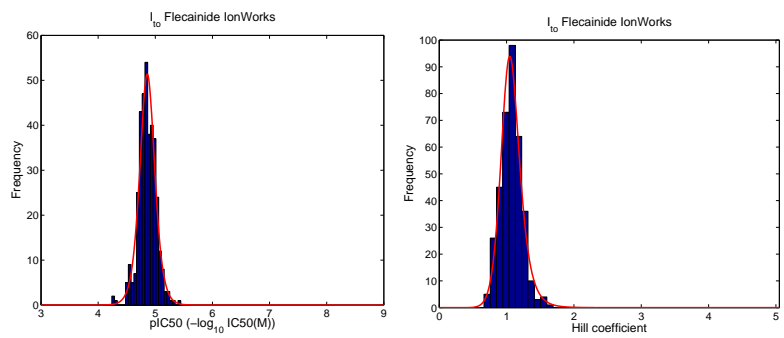

Figure S15: pIC<sub>50</sub> and Hill histograms for IonWorks I<sub>to</sub> control.

## 415 **S.5 Expanded results: simulations**

416 Space limitations in the main paper mean that tables analagous to those  
417 for Alfuzosin in the main text's Table 3 & 4 are presented here for the  
418 compounds: Dofetilide (Tables S2 & S3); Lacosamide (Tables S4 & S5);  
419 Nilotinib (Tables S6 & S7); and Tolterodine (Tables S8 & S9). The results  
420 presented in these tables are discussed in section 3.2 of the main text.

Table S2: Uncertainty in concentration-effect curves for action potential duration under the action of Dofetilide, when considering ion-channel assay variability in  $pIC_{50}$  values (not in Hill coefficients), for various numbers of repeats. Each plot displays action potential duration,  $APD_{90}$ , as a function of concentration. Black lines represent simulation results for each set of sampled concentration-effect inputs, the red line denotes the result when using the numbers reported by the assay directly, with 95% credible intervals imposed.

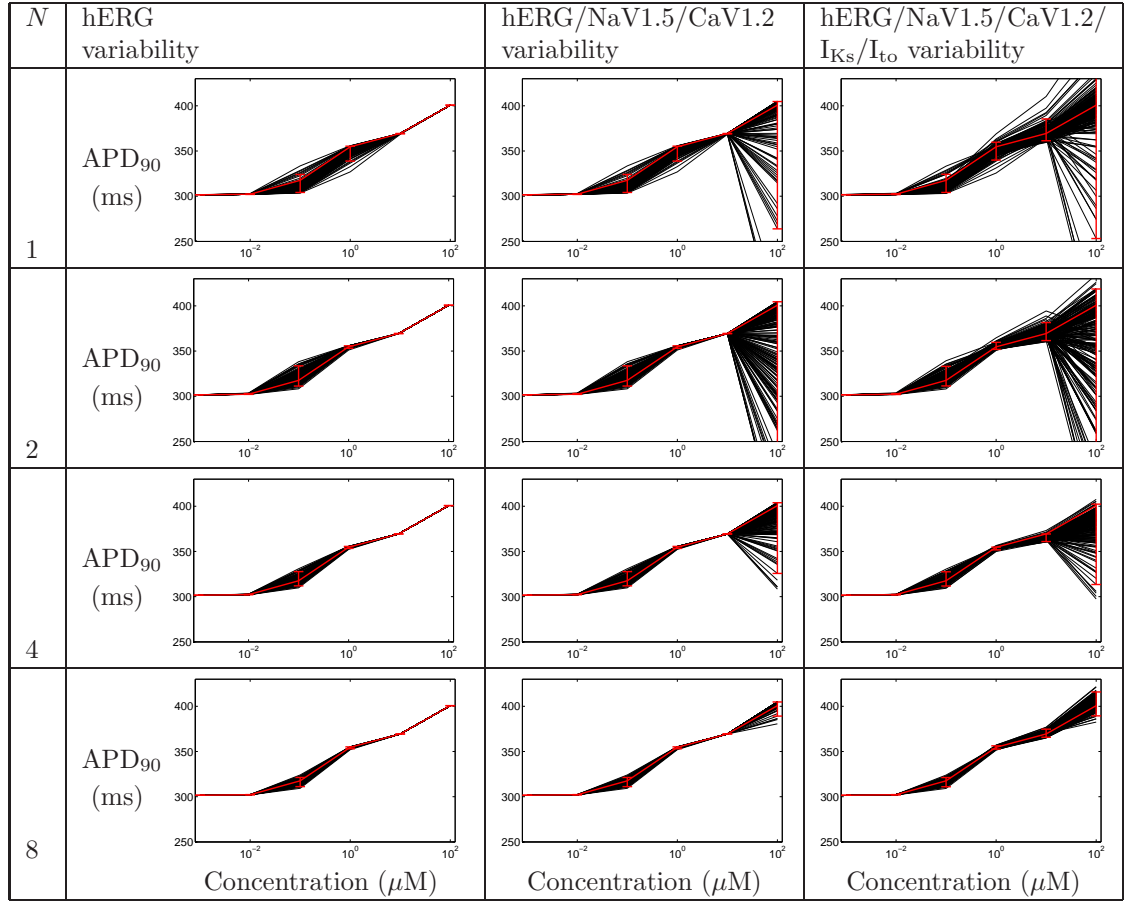



Table S3: Uncertainty in concentration-effect curves for action potential duration under the action of Dofetilide, when considering ion-channel assay variability in  $pIC_{50}$  values and Hill coefficients, for various numbers of repeats. Each plot displays action potential duration,  $APD_{90}$ , as a function of concentration. Black lines represent simulation results for each set of sampled concentration-effect inputs, the red line denotes the result when using the numbers reported by the assay directly, with 95% credible intervals imposed.

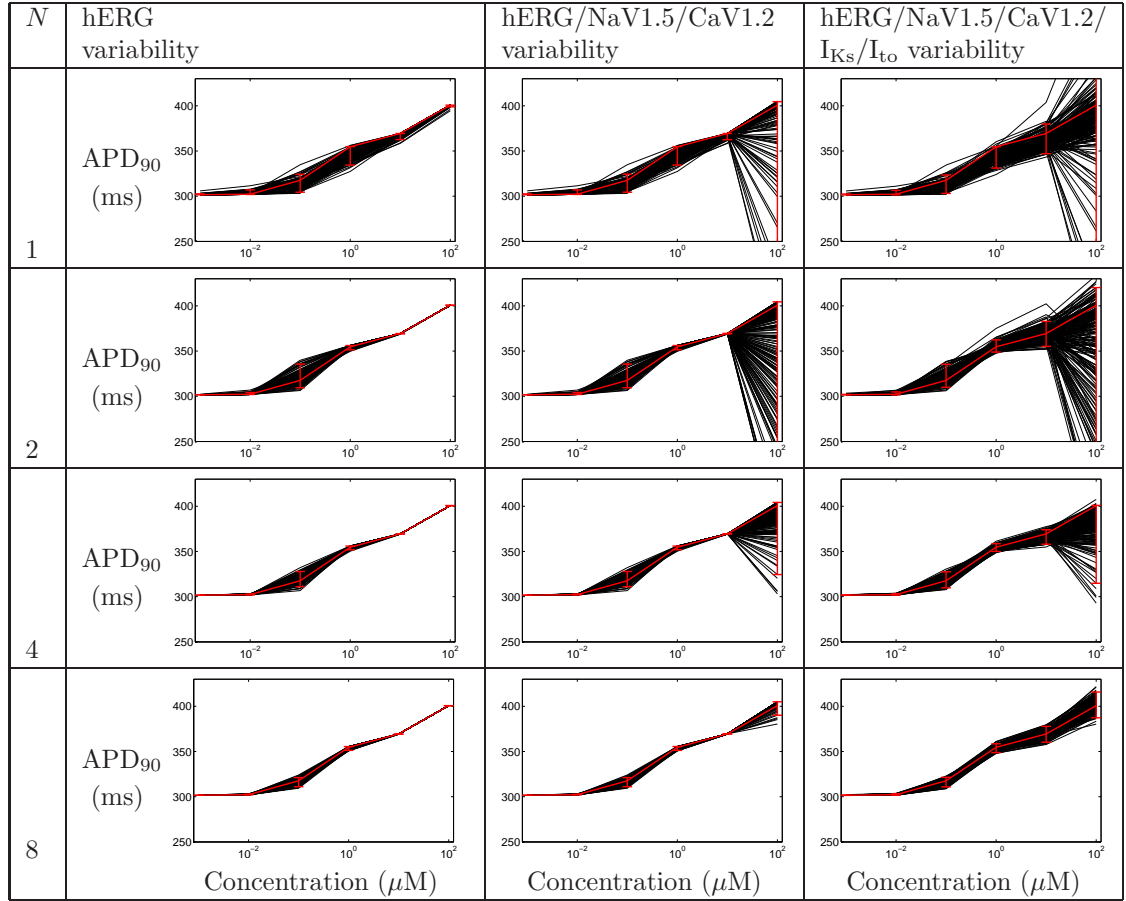

Table S4: Uncertainty in concentration-effect curves for action potential duration under the action of Lacosamide, when considering ion-channel assay variability in  $pIC_{50}$  values (not in Hill coefficients), for various numbers of repeats. Each plot displays action potential duration,  $APD_{90}$ , as a function of concentration. Black lines represent simulation results for each set of sampled concentration-effect inputs, the red line denotes the result when using the numbers reported by the assay directly, with 95% credible intervals imposed.

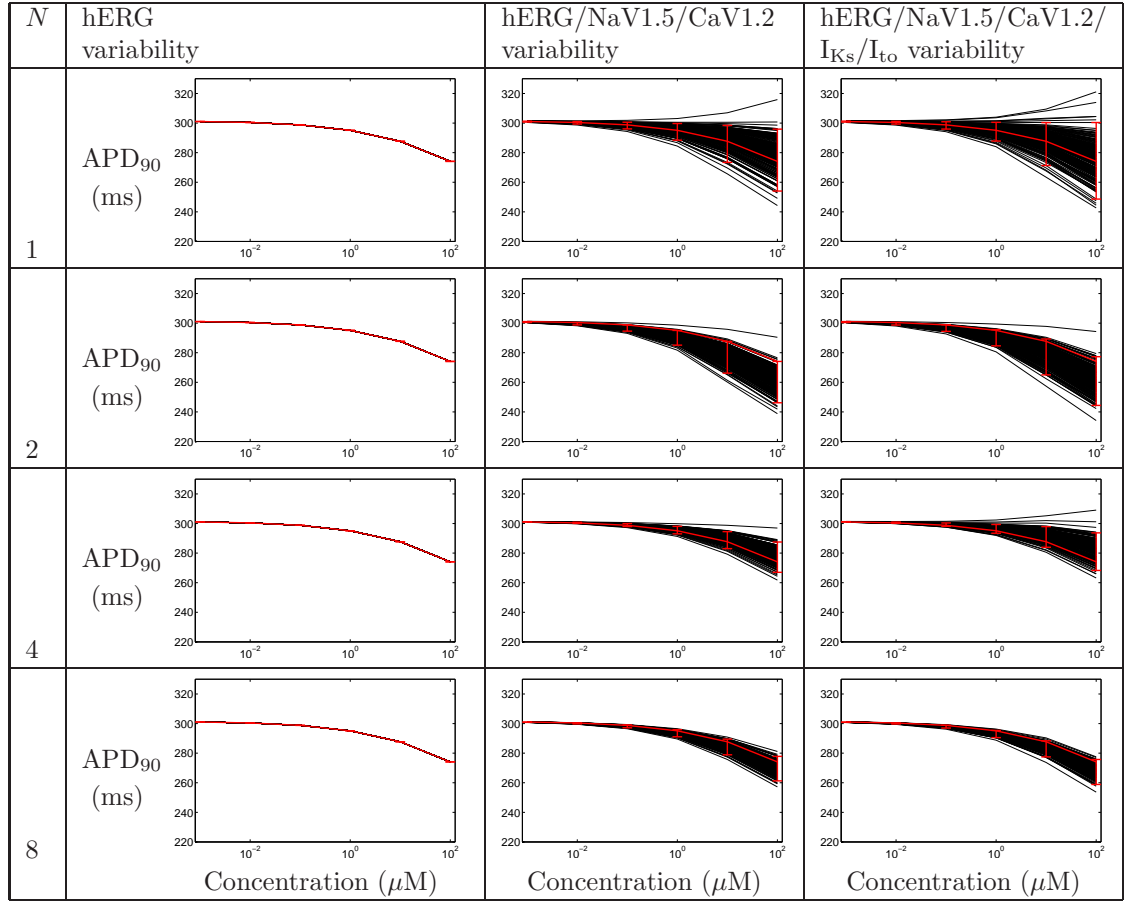

Table S5: Uncertainty in concentration-effect curves for action potential duration under the action of Lacosamide, when considering ion-channel assay variability in  $pIC_{50}$  values and Hill coefficients, for various numbers of repeats. Each plot displays action potential duration,  $APD_{90}$ , as a function of concentration. Black lines represent simulation results for each set of sampled concentration-effect inputs, the red line denotes the result when using the numbers reported by the assay directly, with 95% credible intervals imposed.

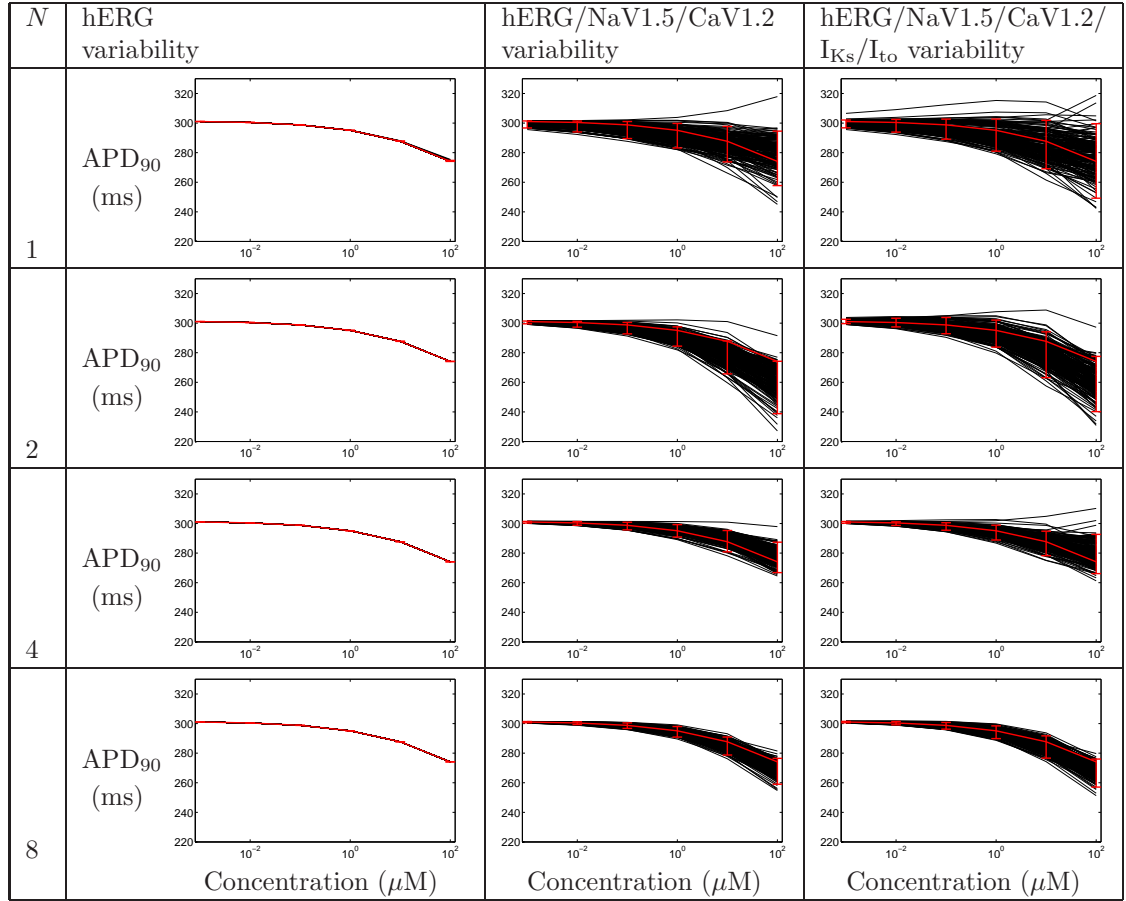

Table S6: Uncertainty in concentration-effect curves for action potential duration under the action of Nilotinib, when considering ion-channel assay variability in  $pIC_{50}$  values (not in Hill coefficients), for various numbers of repeats. Each plot displays action potential duration,  $APD_{90}$ , as a function of concentration. Black lines represent simulation results for each set of sampled concentration-effect inputs, the red line denotes the result when using the numbers reported by the assay directly, with 95% credible intervals imposed.

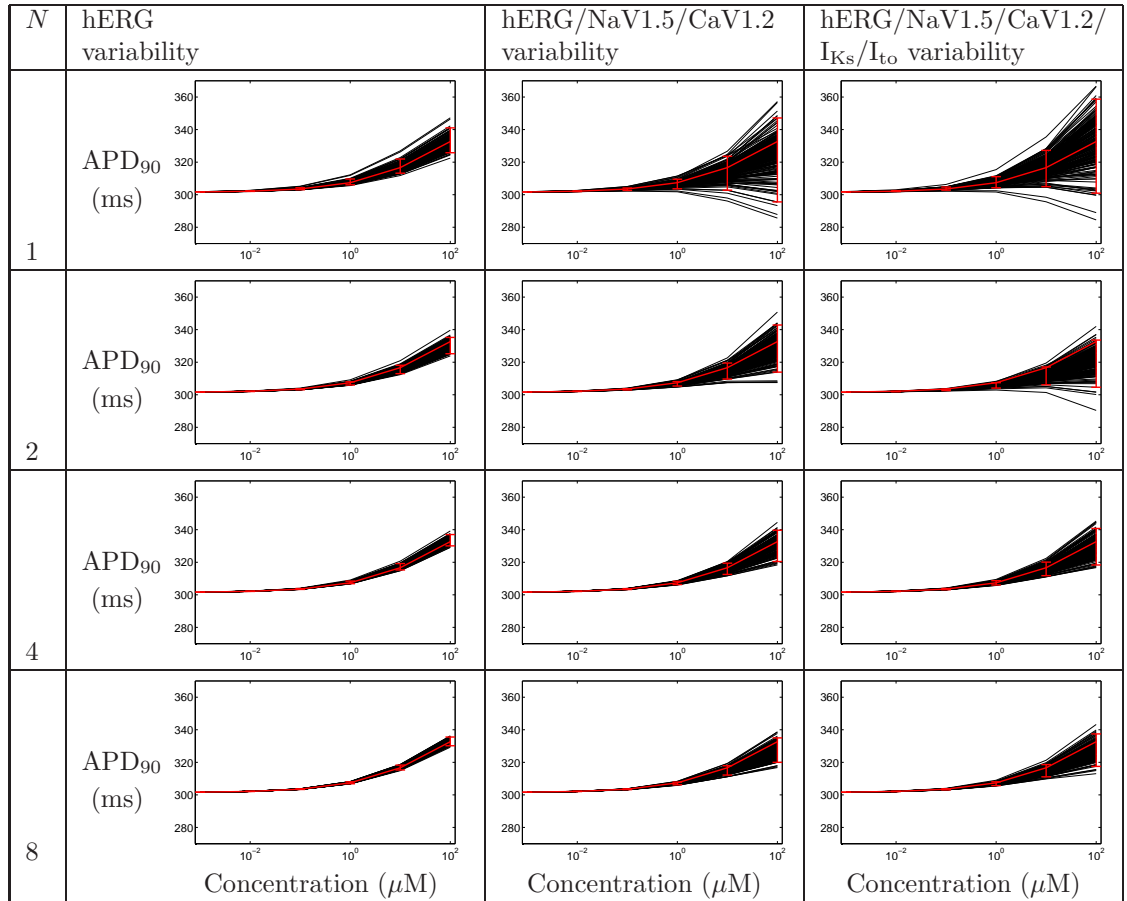

Table S7: Uncertainty in concentration-effect curves for action potential duration under the action of Nilotinib, when considering ion-channel assay variability in  $pIC_{50}$  values and Hill coefficients, for various numbers of repeats. Each plot displays action potential duration,  $APD_{90}$ , as a function of concentration. Black lines represent simulation results for each set of sampled concentration-effect inputs, the red line denotes the result when using the numbers reported by the assay directly, with 95% credible intervals imposed.

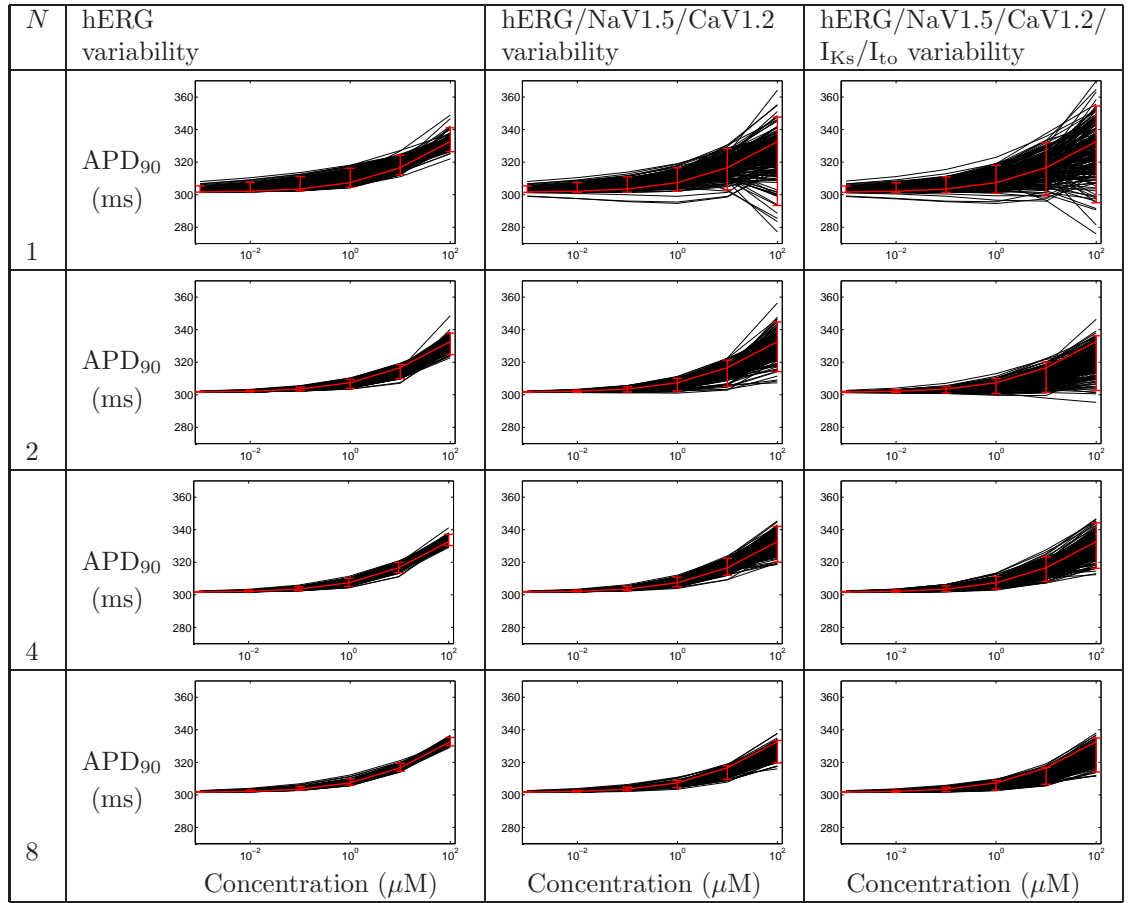

Table S8: Uncertainty in concentration-effect curves for action potential duration under the action of Tolterodine, when considering ion-channel assay variability in  $pIC_{50}$  values (not in Hill coefficients), for various numbers of repeats. Each plot displays action potential duration,  $APD_{90}$ , as a function of concentration. Black lines represent simulation results for each set of sampled concentration-effect inputs, the red line denotes the result when using the numbers reported by the assay directly, with 95% credible intervals imposed.

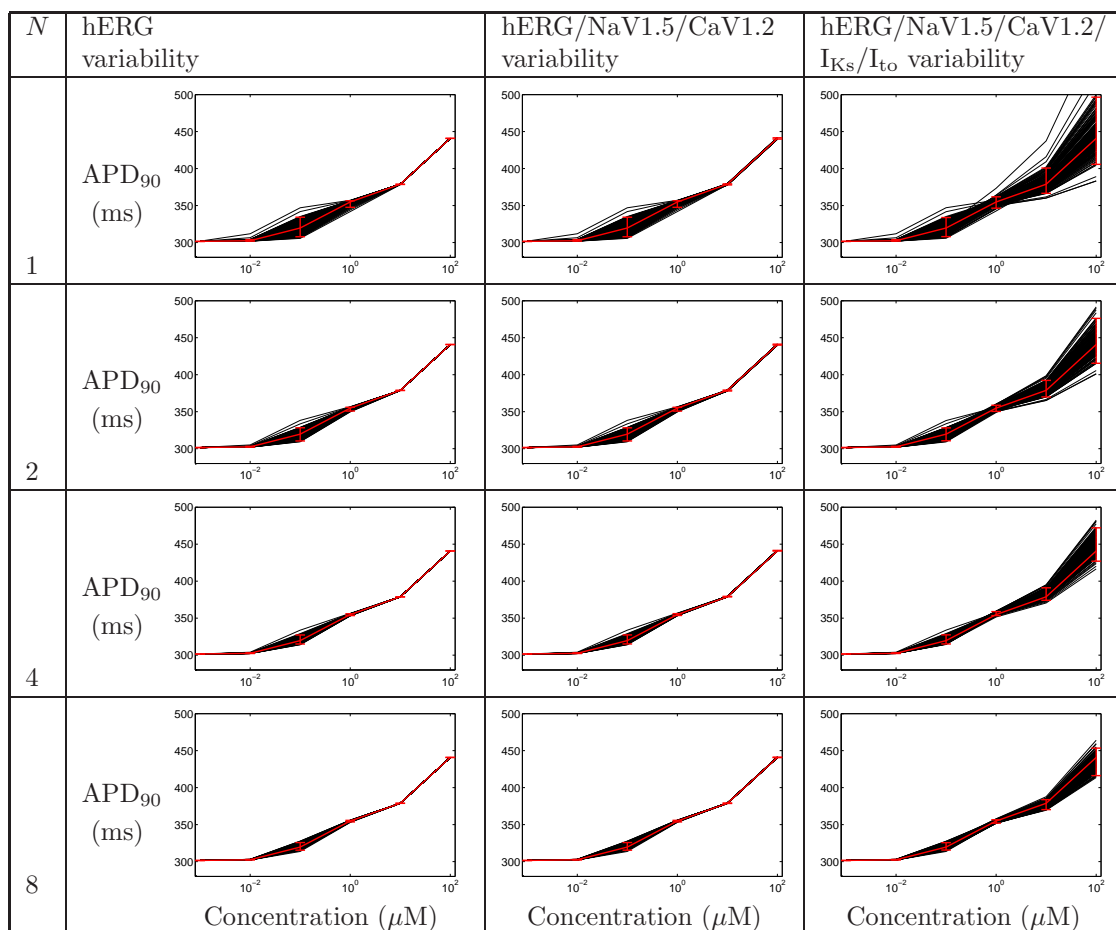

Table S9: Uncertainty in concentration-effect curves for action potential duration under the action of Tolterodine, when considering ion-channel assay variability in  $pIC_{50}$  values and Hill coefficients, for various numbers of repeats. Each plot displays action potential duration,  $APD_{90}$ , as a function of concentration. Black lines represent simulation results for each set of sampled concentration-effect inputs, the red line denotes the result when using the numbers reported by the assay directly, with 95% credible intervals imposed.

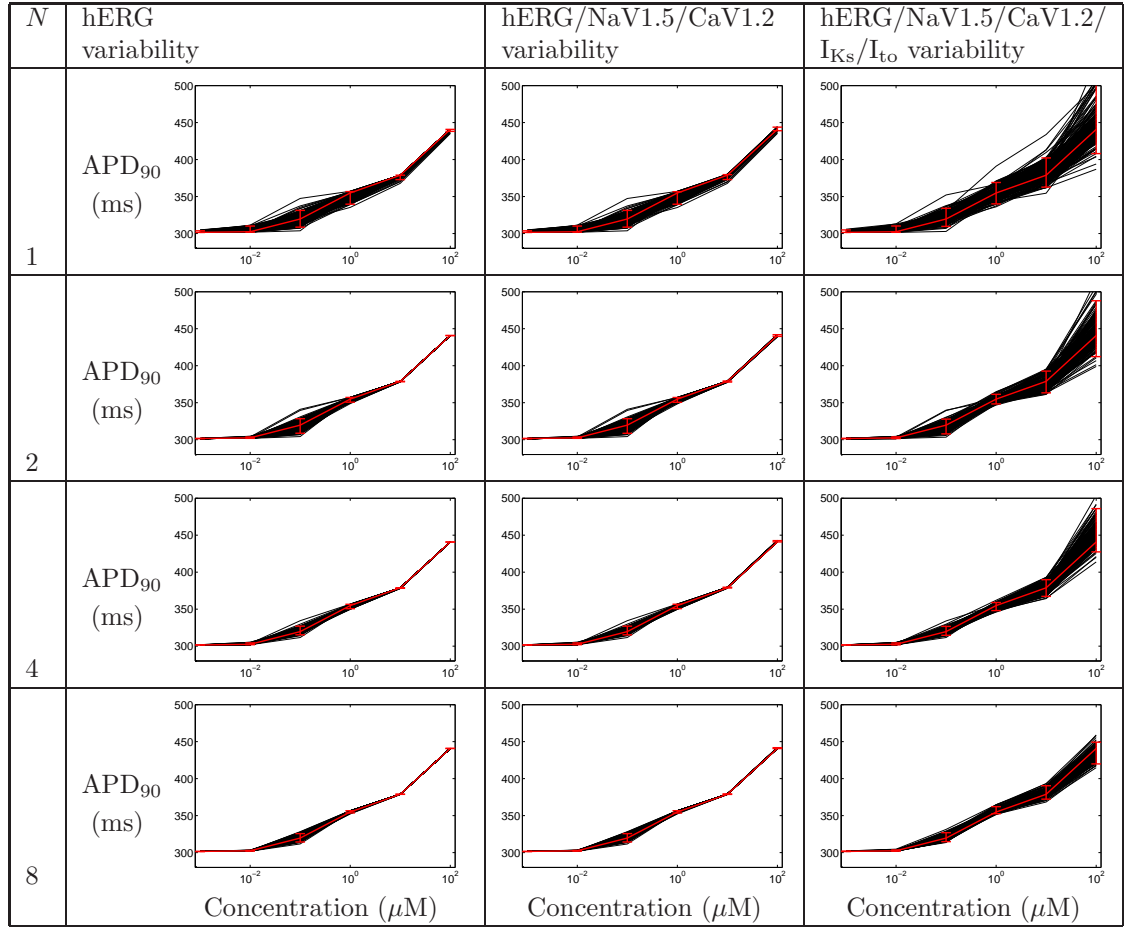

421 **References**

- 422 Davies, M., Mistry, H., Hussein, L., Pollard, C., Valentin, J.-P., Swinton,  
423 J., Abi-Gerges, N., 2012. An in silico canine cardiac midmyocardial action  
424 potential duration model as a tool for early drug safety assessment. *Amer-*  
425 *ican Journal of Physiology - Heart and Circulatory Physiology* 302 (7),  
426 H1466–H1480.
- 427 Persson, F., Carlsson, L., Duker, G., 2005a. Blocking characteristics of  
428 hKv1.5 and hKv4.3/hKChIP2.2 after administration of the novel antiar-  
429 rhythmic compound AZD7009. *Journal of cardiovascular pharmacology*  
430 46 (1), 7–17.
- 431 Persson, F., Carlsson, L., Duker, G., Jacobson, I., 2005b. Blocking Charac-  
432 teristics of hERG, hNav1. 5, and hKvLQT1/hminK after Administration  
433 of the Novel Anti-Arrhythmic Compound AZD7009. *Journal of cardiovas-*  
434 *cular electrophysiology* 16 (3), 329–341.
- 435 Sullivan, E., Tucker, E., Dale, I., 1999. Measurement of [ca<sup>2+</sup>] using the  
436 fluorometric imaging plate reader (flipr). In: Lambert, D. (Ed.), *Calcium*  
437 *Signaling Protocols*. Vol. 114 of *Methods in Molecular Biology*. Humana  
438 Press, pp. 125–133.
